# Supplementary material for: Significance of tumour regression in lymph node metastases of gastric and gastro‐oesophageal junction adenocarcinomas
Source: PubMed Central journal article supplement (PMC7578278; doi:10.1002/cjp2.169), 2020-05-13
Supplement: CJP2-6-263-s001.pdf [file CJP2-6-263-s001.pdf]

**Significance of tumour regression in lymph node metastases of gastric and gastro-oesophageal junction adenocarcinomas**

D Reim *et al*, *J Pathol Clin Res*, DOI: 10.1002/cjp2.169

**Supplementary Material**

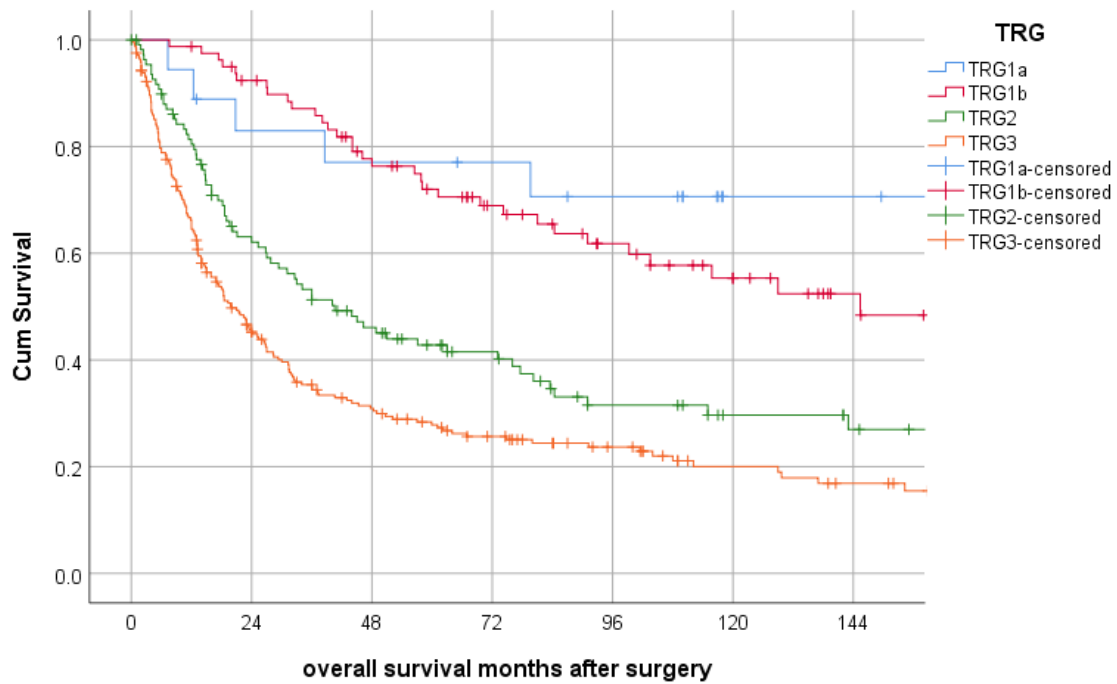

**Figure S1.** Impact of Tumour Regression Grade in the Primary Tumour on Survival ( $p < 0.001$ )

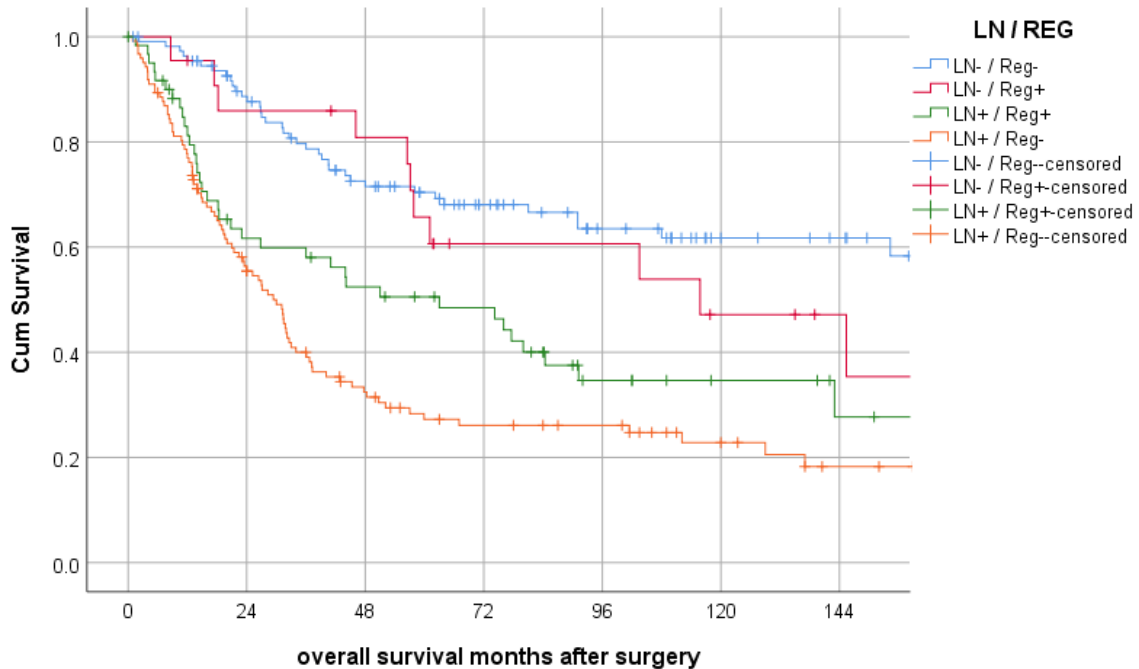

**Figure S2.** Impact of LN / Reg-Categorisation on Survival in Patients with Completely Resected Tumours without Distant Metastases (R0M0;  $p < 0.001$ )

**Table S1** Patient Cohort

|                                  |                                | total | %   |
|----------------------------------|--------------------------------|-------|-----|
| Gender                           | female                         | 140   | 29  |
|                                  | male                           | 340   | 71  |
| Age                              | median 59 years (range; 17-78) |       |     |
| ypT category                     | ypT0                           | 17    | 4   |
|                                  | ypT1                           | 29    | 5   |
|                                  | ypT2                           | 42    | 9   |
|                                  | ypT3                           | 239   | 50  |
|                                  | ypT4                           | 153   | 32  |
| ypN category                     | ypN0                           | 167   | 45  |
|                                  | ypN1                           | 148   | 31  |
|                                  | ypN2                           | 100   | 21  |
|                                  | ypN3                           | 65    | 13  |
| Tumour Regression Grade (Becker) | TRG 1a                         | 17    | 4   |
|                                  | TRG 1b                         | 85    | 18  |
|                                  | TRG 2                          | 121   | 24  |
|                                  | TRG 3                          | 257   | 53  |
| Distant metastases               | absent                         | 408   | 85  |
|                                  | present                        | 72    | 15  |
| Resection status                 | R0                             | 374   | 78  |
|                                  | R1                             | 106   | 22  |
| Grading                          | 1-2                            | 88    | 18  |
|                                  | 3                              | 392   | 82  |
| WHO Subtypes                     | tub/pap/tubpap/sol             | 230   | 48  |
|                                  | mucinous                       | 32    | 7   |
|                                  | poorly cohesive                | 151   | 32  |
|                                  | mixed                          | 41    | 9   |
|                                  | other                          | 26    | 5   |
| Localisation                     | GEJunction                     | 177   | 37  |
|                                  | Stomach                        | 303   | 63  |
| Neoadjuvant CTX                  | PLF                            | 302   | 63  |
|                                  | PLF-T                          | 34    | 7   |
|                                  | EAP                            | 66    | 14  |
|                                  | other                          | 78    | 16  |
| Total                            |                                | 480   | 100 |

**Table S2.** Multivariate Analysis for R0M0 Patients

|                        | HR    | 95.0% CI for HR |       | p-value |
|------------------------|-------|-----------------|-------|---------|
|                        |       | Lower           | Upper |         |
| ypTcategory            | 1.382 | 1.039           | 1.838 | 0.026   |
| LN / Reg status        | 1.405 | 1.175           | 1.680 | >0.001  |
| Tumor Regression Grade | 1.111 | 0.841           | 1.467 | 0.460   |
| Differentiation (G)    | 1.151 | 0.760           | 1.742 | 0.507   |
| WHO subtype            | 1.050 | 0.935           | 1.180 | 0.410   |
